# Supplementary material
Source: Springer Nature journal article supplement (https://www.springermedizin.de/resource/supplementary/12965_2006_38_MOESM3_ESM.pdf/9572986)

M 1 2 3 4 5 6

1000 bp

250 bp

923 bp

176 bp

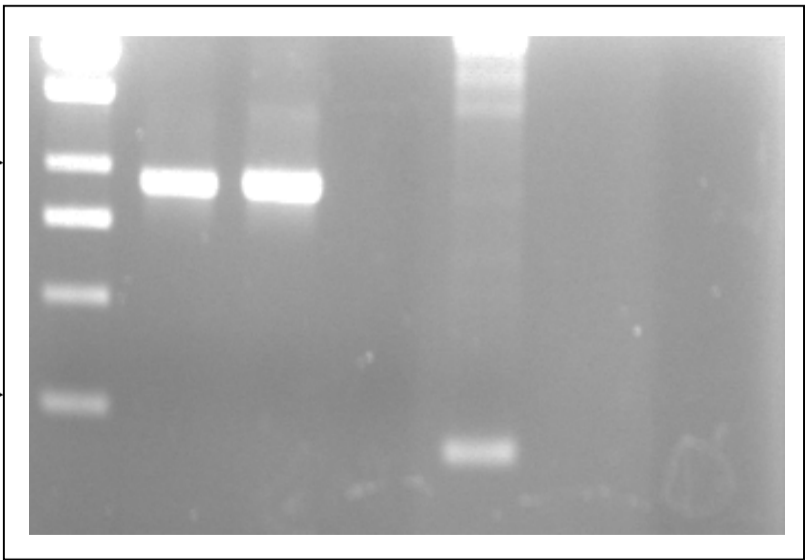

Supplement: MOESM3 [file 9572986]
